# Supplementary material for: Depressive Symptoms, Cardiac Structure and Function, and Risk of Incident Heart Failure With Preserved Ejection Fraction and Heart Failure With Reduced Ejection Fraction in Late Life
Source: PubMed Central journal article supplement — J Am Heart Assoc. 2021 Nov 19;10(23):e020094. doi: 10.1161/JAHA.120.020094 (PMC9075356; doi:10.1161/jaha.120.020094), 2021-11-19
Supplement: JAH3-10-e020094-s001.pdf [file JAH3-10-e020094-s001.pdf]

# **SUPPLEMENTAL MATERIAL**

**Table S1. Association between depressive symptoms and risk of incident HFpEF per unit increase in CES-D score.**

|                                                                                                                                     | n     | Events | HR (95% CI)        | P     |
|-------------------------------------------------------------------------------------------------------------------------------------|-------|--------|--------------------|-------|
| HFpEF                                                                                                                               |       |        |                    |       |
| Adjusted for demographic covariates, socioeconomic indicators, health behaviors, prevalent chronic conditions, and CV risk factors* | 4,758 | 125    | 1.07 (1.02 - 1.14) | 0.01  |
| + echo †                                                                                                                            | 4,710 | 123    | 1.07 (1.02 - 1.13) | 0.01  |
| + cardiac biomarkers ‡                                                                                                              | 4,418 | 118    | 1.08 (1.02 - 1.14) | 0.009 |
| + CRP                                                                                                                               | 4,416 | 118    | 1.08 (1.02 - 1.14) | 0.009 |

\*Demographic covariates include age, sex, and race; socioeconomic indicators include income and education; health behaviors include smoking, drinking, and physical activity; prevalent chronic conditions and CV risk factors include hypertension, diabetes, stroke, prevalent CHD, BMI, heart rate, eGFR

† Echo includes LVMi, LV mean wall thickness, e', and E/e'

‡ Cardiac biomarkers include NT-proBNP and Troponin T

CI = confidence interval; HR = hazard ratio; other abbreviations as in **Table 1**

**Table S2. Adjusted Hazard Ratios for depressive symptoms and risk of incident HFpEF or HF with unknown LVEF and HFrEF or HF with unknown LVEF.**

|                               | n     | Events | HR (95%)           | p     |
|-------------------------------|-------|--------|--------------------|-------|
| HFpEF or HF with unknown LVEF |       |        |                    |       |
| Model 1*                      | 5,086 | 177    | 1.09 (1.04 - 1.14) | 0.001 |
| Model 2†                      | 4,758 | 161    | 1.06 (1.01 - 1.11) | 0.02  |
| HFrEF or HF with unknown LVEF |       |        |                    |       |
| Model 1*                      | 5,086 | 167    | 1.06 (1.01 - 1.11) | 0.02  |
| Model 2†                      | 4,758 | 149    | 1.01 (0.96 - 1.07) | 0.64  |

\* Model 1 adjusts for demographics (age, sex, race, and field center)

† Model 2 adjusts for model 1, socioeconomic indicators (education, income), health behaviors (smoking, drinking, physical activity), prevalent chronic conditions and CV risk factors (hypertension, diabetes, atrial fibrillation, stroke, history of myocardial infarction, prevalent CHD, BMI, heart rate, eGFR)

CI = confidence interval; HR = hazard ratio

**Table S3. Sensitivity analysis with adjusted Hazard Ratios for incident HFpEF adjusting for cognition and medical adherence.**

|                   | n     | Events | HR (95 % CI)       | p    |
|-------------------|-------|--------|--------------------|------|
| Medical adherence |       |        |                    |      |
| Model 2*          | 4,663 | 125    | 1.07 (1.02 - 1.14) | 0.01 |
| Model 3†          | 4,663 | 125    | 1.08 (1.02 - 1.14) | 0.01 |
| Cognition         |       |        |                    |      |
| Model 2*          | 4,753 | 125    | 1.07 (1.02 - 1.14) | 0.01 |
| Model 4‡          | 4,753 | 125    | 1.07 (1.02 - 1.14) | 0.01 |

\* Model 2 adjusts for demographics (age, sex, race, field center), socioeconomic indicators (education, income) health behaviors (smoking, drinking, physical activity, prevalent chronic conditions and CV risk factors (hypertension, diabetes, atrial fibrillation, stroke, history of myocardial infarction, prevalent CHD, BMI, heart rate, eGFR)

† Model 3 adjusts for model 2, and medical adherence

‡ Model 4 adjusts for model 2, and cognition

CI = confidence interval; HR = hazard ratio

**Table S4. Association between depressive symptoms and incident HFpEF and HFrEF after excluding events occurring in the first year of follow-up.**

| Outcome | Events | Model 1*           |         | Model 2†           |         |
|---------|--------|--------------------|---------|--------------------|---------|
|         |        | HR (CI 95%)        | P-value | HR (CI 95%)        | P-value |
| HFpEF   | 122    | 1.11 (1.05 – 1.17) | 0.001   | 1.08 (1.02 – 1.15) | 0.006   |
| HFrEF   | 115    | 1.07 (1.00 – 1.13) | 0.04    | 1.01 (.95 – 1.09)  | 0.67    |

\* Model 1 adjusts for demographics (age, sex, race, and field center)

† Model 2 adjusts for demographics (age, sex, race, field center), socioeconomic indicators (education, income), health behaviors (smoking, drinking, physical activity), prevalent chronic conditions (hypertension, diabetes, atrial fibrillation, stroke, history of myocardial infarction, prevalent CHD, BMI, heart rate, eGFR)

CI = confidence interval; HR = hazard ratio

**Table S5. Association between depressive symptoms and risk of incident HFpEF using a forward selection model to determine model covariates for inclusion.**

|                        | n     | Events | HR (95% CI)        | p    |
|------------------------|-------|--------|--------------------|------|
| HFpEF                  |       |        |                    |      |
| Model covariates*      | 4,966 | 133    | 1.06 (1.01 - 1.12) | 0.03 |
| + echo †               | 4,908 | 129    | 1.06 (1.00 - 1.11) | 0.03 |
| + cardiac biomarkers ‡ | 4,603 | 122    | 1.06 (1.01 - 1.12) | 0.02 |
| + CRP                  | 4,601 | 122    | 1.06 (1.00 - 1.11) | 0.03 |

\*Model covariates include age, eGFR, hypertension, stroke, atrial fibrillation

† Echo includes LVMi, LV mean wall thickness, e', and E/e'

‡ Cardiac biomarkers include NT-proBNP and Troponin T

P-value for selection of covariates: 0.01

CI = confidence interval; HR = hazard ratio; other abbreviations as in **Table 1**

**Table S6. Association between depressive symptoms and risk of incident HFpEF using ARIC heart failure risk scores.**

|                        | n     | Events | HR (95% CI)        | p     |
|------------------------|-------|--------|--------------------|-------|
| HFpEF                  |       |        |                    |       |
| ARIC HF risk score*    | 4,525 | 117    | 1.07 (1.01 - 1.13) | 0.01  |
| + echo †               | 4,484 | 115    | 1.07 (1.01 - 1.13) | 0.02  |
| + cardiac biomarkers ‡ | 4,183 | 109    | 1.08 (1.02 - 1.14) | 0.005 |
| + CRP                  | 4,181 | 109    | 1.08 (1.02 - 1.14) | 0.006 |

\*ARIC HF risk score includes age, race, sex, heart rate, systolic blood pressure, hypertension  
BP-lowering medication use, diabetes, coronary heart disease, smoking, BMI

† Echo includes LVMi, LV mean wall thickness, e', and E/e'

‡ Cardiac biomarkers include NT-proBNP and Troponin T

CI = confidence interval; HR = hazard ratio; other abbreviations as in **Table 1**





**Figure S2. Associations of depressive symptoms with incident HFpEF, HFrEF and the composite outcomes HFpEF/death and HFrEF/death in models incorporating inverse probability weights§.**

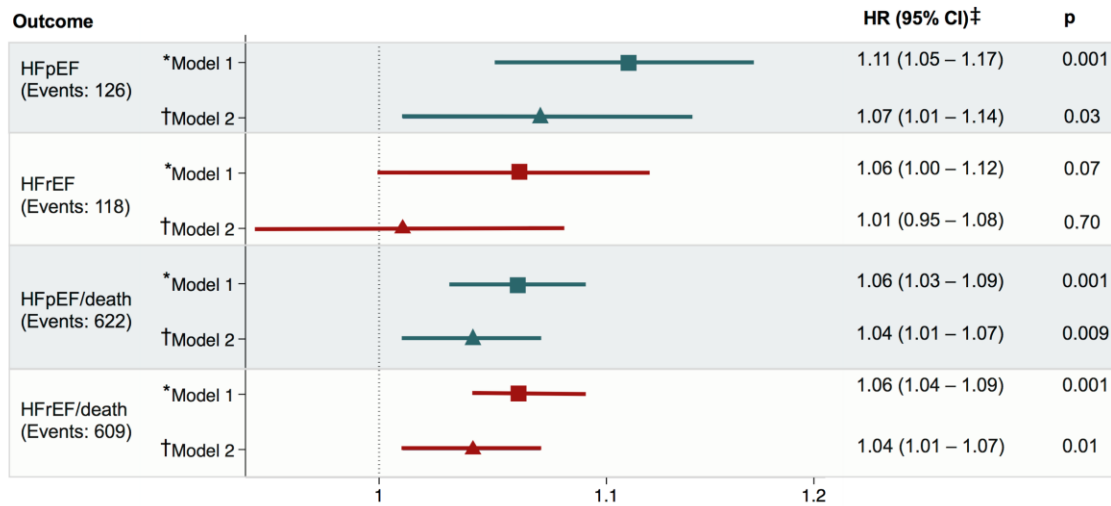

Greater depressive symptoms were associated with a higher risk of developing HFpEF but not HFrEF after adjusting for demographics and cardiovascular risk factors.

\* Model 1 adjusts for demographics (age, sex, race, and field center)

† Model 2 adjusts for model 1, socioeconomic indicators (education, income), health behaviors (smoking, drinking, physical activity), prevalent chronic conditions and CV risk factors (hypertension, diabetes, atrial fibrillation, stroke, history of myocardial infarction, prevalent CHD, BMI, heart rate, eGFR)

‡ HR is per unit increase CES-D score

§ For inverse probability weights, Visit 5 non-attendance was modeled among participants alive at the initiation of Visit 5 using the following covariates from Visit 1: age, sex, race, field center, smoking, drinking, hypertension, diabetes, atrial fibrillation, stroke, income, education, history of myocardial infarction, prevalent CHD, physical activity, BMI, heart rate, eGFR.

CI = Confidence Interval; HR = Hazard Ratio; HFpEF = Heart Failure with Preserved Ejection Fraction; HFrEF = Heart Failure with Reduced Ejection Fraction
